# Supplementary material
Source: PubMed Central journal article supplement (PMC5119858)

(A)

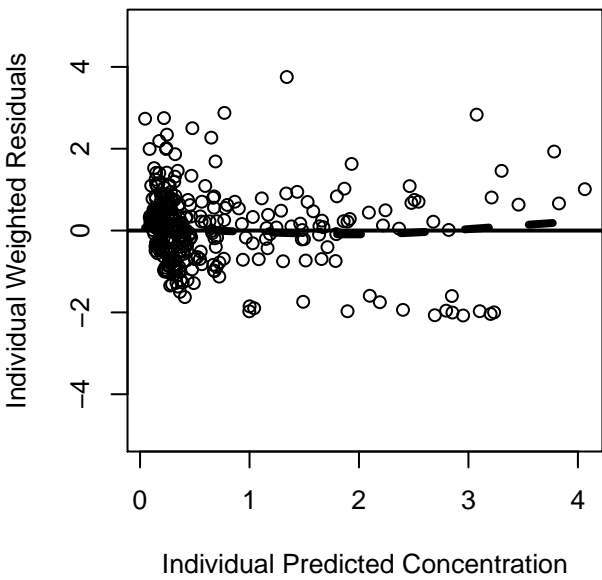

(B)

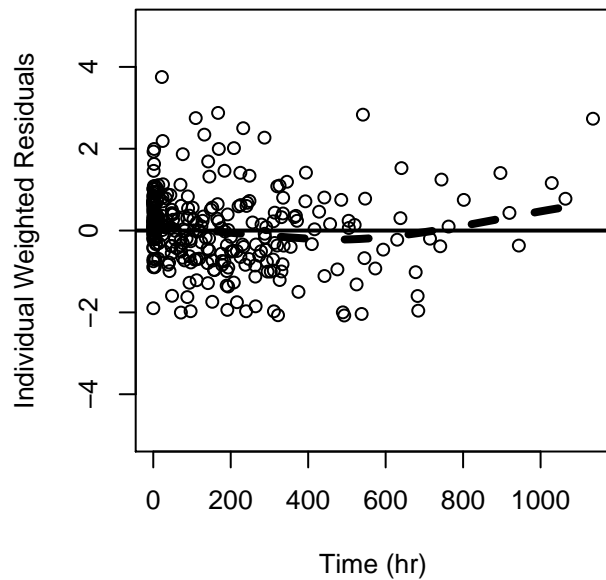

(C)

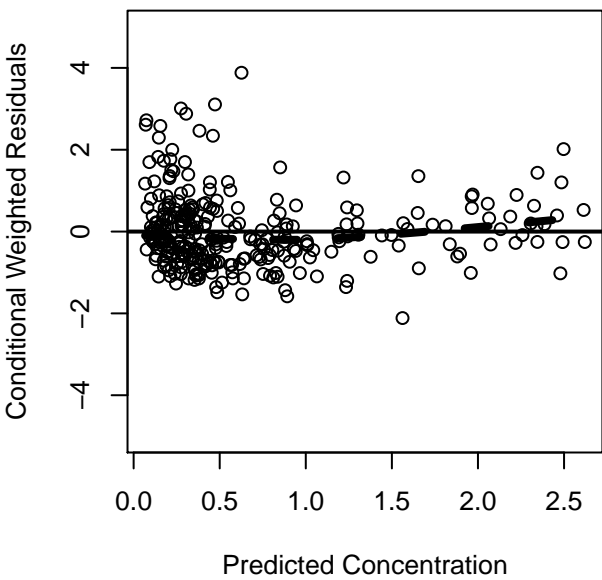

Supplement: NIHMS830474-supplement-Supplemental.pdf [file NIHMS830474-supplement-Supplemental.pdf]
